# Supplementary material for: Tannic acid/Mg2+-based versatile coating to manipulate the osteoimmunomodulation of implants
Source: Royal Society of Chemistry journal article supplement (doi:10.1039/d0tb01577f), 2020-12-23
Supplement: d0tb01577f1.pdf [file d0tb01577f1.pdf]

## **Tannic Acid/Mg<sup>2+</sup> Based Versatile Coating to Manipulate**

### **Osteoimmunomodulation of Implants**

Min He<sup>a, b, c, d</sup>, Xinhui Gao<sup>a, b, c</sup>, Yadi Fan<sup>d</sup>, Li Xie<sup>a, b, c</sup>, Mo Yang<sup>d\*</sup> and Weidong Tian<sup>a, b, c\*</sup>

<sup>a</sup> Engineering Research Center of Oral Translational Medicine, Ministry of Education, West China Hospital of Stomatology, Sichuan University, Chengdu, Sichuan 610041, China

<sup>b</sup> National Engineering Laboratory for Oral Regenerative Medicine, West China Hospital of Stomatology, Sichuan University, Chengdu, Sichuan 610041, China

<sup>c</sup> State Key Laboratory of Oral Diseases, West China Hospital of Stomatology, Sichuan University, Chengdu, Sichuan 610041, China

<sup>d</sup> Department of Biomedical Engineering, The Hong Kong Polytechnic University, Hung Hom, Kowloon, Hong Kong, P. R. China

**Table S1. RNA Primers applied in this study**

| <b>GENE</b>                    | <b>Forward primer (5'-3')</b> | <b>Reverse primer (5'-3')</b> |
|--------------------------------|-------------------------------|-------------------------------|
| <b>GAPDH</b>                   | TGACCACAGTCCATGCCATC          | GACGGACACATTGGGGGTAG          |
| <b>IL-1<math>\beta</math></b>  | TGGAGAGTGTGGATCCCAAG          | GGTGCTGATGTACCAGTTGG          |
| <b>IL-6</b>                    | ATAGTCCTTCTACCCCAATTTC<br>C   | GATGAATTGGATGGTCTTGGTCC       |
| <b>IL-10</b>                   | GAGAAGCATGGCCCAGAAATC         | GAGAAATCGATGACAGCGCC          |
| <b>TNF-<math>\alpha</math></b> | CTGAACTTCGGGGTGATCGG          | GGCTTGTCACCTCGAATTTTGAGA      |
| <b>INOS</b>                    | CACCAAGCTGAACTTGAGCG          | CGTGGCTTTGGGCTCCTC            |
| <b>CD206</b>                   | AGACGAAATCCCTGCTACTG          | CACCCATTCTGAAGGCATTC          |
| <b>CD163</b>                   | CGTGTGCAGTGTCCAAAAGG          | CACAAACCAAGAGTGCCGTG          |
| <b>CD86</b>                    | CTGCTCATCATTGTATGTCAC         | ACTGCCTTCACTCTGCATTTG         |
| <b>BMP2</b>                    | GCTCCACAAACGAGAAAAGC          | AGCAAGGGGAAAAGGACACT          |
| <b>TGF-<math>\beta</math>1</b> | CAGTACAGCAAGGTCCTTGC          | ACGTAGTAGACGATGGGCAG          |
| <b>VEGF</b>                    | GTCCCATGAAGTGATCAAGTTC        | TCTGCATGGTGATGTTGCTCTCT<br>G  |
| <b>ALP</b>                     | AGGGTGGGTAGTCATTTGCATA<br>G   | GAGGCATACGCCATCACATG          |
| <b>OCN</b>                     | CCGGGAGCAGTGTGAGCTTA          | AGGCGGTCTTCAAGCCATACT         |
| <b>OST</b>                     | CCCTTCTCAAGCACCAATGG          | AGGGTGGGTAGTCATTTGCATAG       |
| <b>COL-1</b>                   | CTCCGGCTCCTGCTCCTCTTA         | ACCAGGAAGTCCAGGCTGTC          |

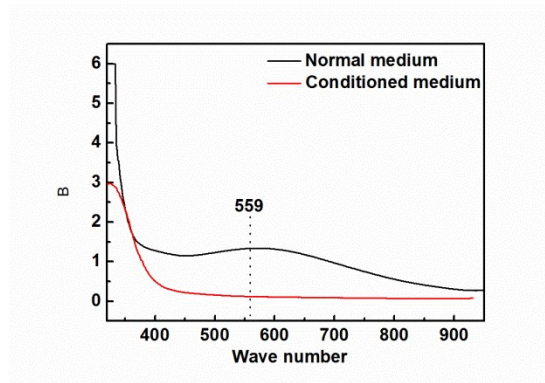

**Fig. S1.** The UV-vis absorption spectra of the normal cell culture medium and conditioned medium with  $\text{Fe}^{3+}$ .

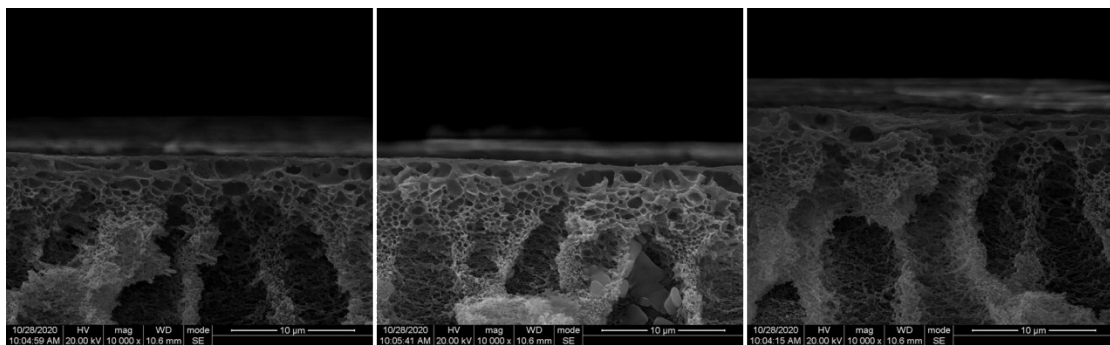

**Fig. S2.** The cross-section SEM images of the TA/ $\text{Mg}^{2+}$  coating on PES membrane surface.
